# Supplementary material for: Norepinephrine-Induced Calcium Signaling and Store-Operated Calcium Entry in Olfactory Bulb Astrocytes
Source: Frontiers journal article supplement (doi:10.3389/fncel.2021.639754), 2021-03-23
Supplement: Data_Sheet_1.PDF [file Data_Sheet_1.PDF]

## Supplementary Material

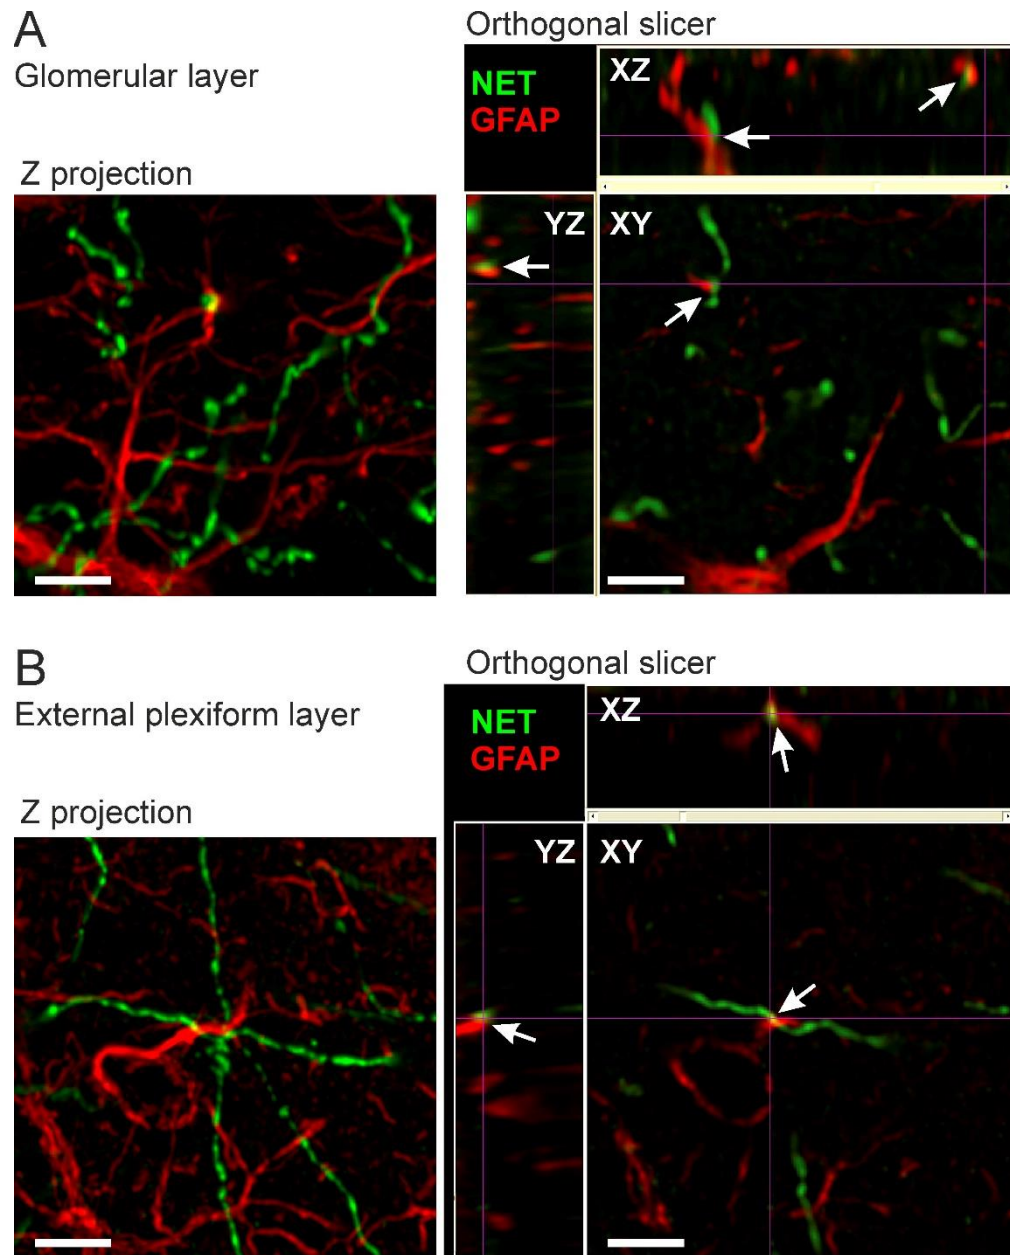

**Supplementary Figure 1.** Close proximity of noradrenergic fibers stained for norepinephrine transporter NET (green) and astrocyte processes stained for GFAP (red) in the glomerular layer (A) and external plexiform layer (B). Z projections give an overview of the entire structures, while the orthogonal slicer provides spatial information in single plains in XY, XZ and YZ orientation. Arrows indicate NET-positive fibers adjacent to astrocyte processes. Scale bars: 5  $\mu$ m.
